# Supplementary material
Source: PubMed Central journal article supplement (PMC4124915)
Supplement: NIHMS591893-supplement-Appendix_tables.pdf [file NIHMS591893-supplement-Appendix_tables.pdf]

**Appendix Table 1. Lifetime and 12-month prevalence of DSM-IV/CIDI ADHD in the NCS-A sample**

|                                | <b>Total</b> |             | <b>Boys</b> |             | <b>Girls</b> |             |
|--------------------------------|--------------|-------------|-------------|-------------|--------------|-------------|
|                                | <b>%</b>     | <b>(se)</b> | <b>%</b>    | <b>(se)</b> | <b>%</b>     | <b>(se)</b> |
| <b>Lifetime prevalence</b>     | 8.1          | (0.6)       | 12.1*       | (0.9)       | 3.9          | (0.5)       |
| <b>Twelve-month prevalence</b> | 6.3          | (0.5)       | 9.6*        | (0.9)       | 2.8          | (0.5)       |
| (n)                            | (6,483)      |             | (3,150)     |             | (3,333)      |             |

---

DSM-IV/CIDI, Diagnostic and Statistical Manual of Mental Disorders, Fourth Edition;  
 CIDI, The World Health Organization Composite International Diagnostic Interview;  
 ADHD, attention-deficit/hyperactivity disorder  
 \*Significant difference between boys and girls at the .05 level, two-sided test

**Appendix Table 2a. Associations of lifetime DSM-IV/CIDI ADHD with the subsequent lifetime onset of other DSM-IV/CIDI disorders among boys<sup>a</sup> (n=3,150)**

|                                           | Prevalence of comorbid disorder |       | Proportion of comorbid cases in which ADHD is temporal primary |        | OR   | (95% CI)   |
|-------------------------------------------|---------------------------------|-------|----------------------------------------------------------------|--------|------|------------|
|                                           | %                               | (se)  | %                                                              | (se)   |      |            |
| <b>I. Mood disorders</b>                  |                                 |       |                                                                |        |      |            |
| MDD/dysthymia                             | 37.8                            | (4.5) | 85.6                                                           | (4.5)  | 4.2* | (3.0-5.8)  |
| Bipolar disorder                          | 13.1                            | (2.5) | 87.3                                                           | (5.4)  | 2.5* | (1.4-4.5)  |
| Any mood disorder                         | 45.3                            | (4.6) | 86.0                                                           | (4.0)  | 3.9* | (2.9-5.3)  |
| <b>II. Anxiety disorders</b>              |                                 |       |                                                                |        |      |            |
| Specific phobia                           | 22.6                            | (2.4) | 42.2                                                           | (6.5)  | 1.5* | (1.1-2.0)  |
| Social phobia                             | 8.7                             | (2.2) | 56.1                                                           | (6.5)  | 1.5  | (0.9-2.6)  |
| Panic disorder                            | 2.1                             | (1.0) | 59.4                                                           | (22.1) | 1.0  | (0.4-2.6)  |
| Separation anxiety disorder               | 6.6                             | (1.7) | 64.8                                                           | (5.0)  | 1.2  | (0.7-2.1)  |
| Post-traumatic stress disorder            | 3.5                             | (1.4) | 72.1                                                           | (8.0)  | 1.7  | (0.6-4.5)  |
| Generalized anxiety disorder              | 0.9                             | (0.3) | 100.0                                                          | --     | 2.8  | (0.9-8.6)  |
| Any anxiety disorder                      | 30.4                            | (3.5) | 44.2                                                           | (5.2)  | 1.4* | (1.01-2.0) |
| <b>III. Disruptive behavior disorders</b> |                                 |       |                                                                |        |      |            |
| Conduct disorder                          | 24.8                            | (4.2) | 83.4                                                           | (4.0)  | 5.1* | (3.0-8.7)  |
| Oppositional defiant disorder             | 47.3                            | (4.2) | 69.5                                                           | (5.0)  | 7.0* | (5.2-9.5)  |
| Intermittent explosive disorder           | 23.8                            | (2.8) | 81.5                                                           | (3.8)  | 2.2* | (1.6-3.0)  |
| Eating disorders                          | 13.9                            | (3.7) | 100.0                                                          | --     | 4.9* | (3.0-8.2)  |
| Any disruptive behavior disorder          | 67.8                            | (3.2) | 71.2                                                           | (3.7)  | 4.7* | (3.8-5.8)  |
| <b>IV. Substance abuse</b>                |                                 |       |                                                                |        |      |            |
| Alcohol abuse                             | 14.9                            | (3.9) | 99.8                                                           | (0.1)  | 2.6* | (1.4-4.9)  |
| Drug abuse                                | 18.1                            | (3.6) | 100.0                                                          | --     | 2.3* | (1.4-3.6)  |
| Any substance disorder                    | 24.7                            | (4.3) | 99.9                                                           | (0.0)  | 2.5* | (1.5-4.1)  |
| <b>V. Any disorder</b>                    |                                 |       |                                                                |        |      |            |
|                                           | 81.1                            | (2.3) | 58.8                                                           | (4.7)  | 2.8* | (2.4-3.2)  |

DSM-IV/CIDI, Diagnostic and Statistical Manual of Mental Disorders, Fourth Edition; CIDI, The World Health Organization Composite International Diagnostic Interview; ADHD, attention-deficit/hyperactivity disorder; MDD, Major depressive disorder.

\*Significant at the .05 level, two-sided test

<sup>a</sup>A discrete-time survival models with person-year as the unit of analysis were used to predict first onset of each outcome disorder. ADHD was treated as time-varying (i.e., turned on only at age-of-onset) and controls were used for the socio-demographic variables in Table 1. Person-year was coded as a series of year-specific dummy predictor variables. The models were estimated using a logistic link function.

**Appendix Table 2b. Associations of lifetime DSM-IV/CIDI ADHD with the subsequent lifetime onset of other DSM-IV/CIDI disorders among girls<sup>a</sup> (n=3,333)**

|                                           | Prevalence of comorbid disorder |       | Proportion of comorbid cases in which ADHD is temporal primary |        | OR   | (95% CI)   |
|-------------------------------------------|---------------------------------|-------|----------------------------------------------------------------|--------|------|------------|
|                                           | %                               | (se)  | %                                                              | (se)   |      |            |
| <b>I. Mood disorders</b>                  |                                 |       |                                                                |        |      |            |
| MDD/dysthymia                             | 49.3                            | (5.3) | 92.2                                                           | (3.7)  | 2.9* | (2.1-4.0)  |
| Bipolar disorder                          | 13.4                            | (3.8) | 97.0                                                           | (3.3)  | 2.5* | (1.4-4.5)  |
| Any                                       | 54.6                            | (5.3) | 92.2                                                           | (3.5)  | 2.9* | (2.2-4.0)  |
| <b>II. Anxiety disorders</b>              |                                 |       |                                                                |        |      |            |
| Specific phobia                           | 31.8                            | (3.7) | 32.3                                                           | (10.0) | 1.5* | (1.1-2.0)  |
| Social phobia                             | 10.3                            | (3.0) | 87.0                                                           | (0.7)  | 0.9  | (0.5-1.7)  |
| Panic disorder                            | 5.1                             | (2.3) | 66.9                                                           | (16.2) | 2.1  | (0.8-5.8)  |
| Separation anxiety disorder               | 16.3                            | (4.5) | 70.8                                                           | (5.1)  | 1.8  | (0.98-3.5) |
| Post-traumatic stress disorder            | 18.0                            | (5.6) | 95.7                                                           | (1.3)  | 2.9* | (1.5-5.5)  |
| Generalized anxiety disorder              | 4.1                             | (1.3) | 69.4                                                           | (24.1) | 2.1  | (0.95-4.4) |
| Any                                       | 50.7                            | (5.2) | 47.3                                                           | (9.6)  | 1.5* | (1.1-1.9)  |
| <b>III. Disruptive behavior disorders</b> |                                 |       |                                                                |        |      |            |
| Conduct disorder                          | 14.6                            | (3.5) | 81.8                                                           | (5.4)  | 3.0* | (1.6-5.7)  |
| Oppositional defiant disorder             | 43.7                            | (5.3) | 73.9                                                           | (5.5)  | 6.1* | (4.0-9.3)  |
| Intermittent explosive disorder           | 22.7                            | (6.0) | 74.0                                                           | (2.7)  | 2.5* | (1.4-4.3)  |
| Eating disorders                          | 7.9                             | (2.7) | 91.4                                                           | (0.8)  | 1.2  | (0.6-2.7)  |
| Any                                       | 54.6                            | (5.8) | 67.6                                                           | (6.1)  | 3.6* | (2.5-5.2)  |
| <b>IV. Substance abuse</b>                |                                 |       |                                                                |        |      |            |
| Alcohol abuse                             | 7.0                             | (2.8) | 100.0                                                          | --     | 1.6  | (0.6-4.2)  |
| Drug abuse                                | 15.0                            | (3.2) | 100.0                                                          | --     | 2.1* | (1.2-3.7)  |
| Any                                       | 16.3                            | (3.3) | 100.0                                                          | --     | 1.8* | (1.1-3.2)  |
| <b>V. Any disorder</b>                    |                                 |       |                                                                |        |      |            |
|                                           | 72.7                            | (6.0) | 43.2                                                           | 5.9    | 1.8* | (1.4-2.5)  |

DSM-IV/CIDI, Diagnostic and Statistical Manual of Mental Disorders, Fourth Edition; CIDI, The World Health Organization Composite International Diagnostic Interview; ADHD, attention-deficit/hyperactivity disorder; MDD, Major depressive disorder.

\*Significant at the .05 level, two-sided test

<sup>a</sup>A discrete-time survival models with person-year as the unit of analysis were used to predict first onset of each outcome disorder. ADHD was treated as time-varying (i.e., turned on only at age-of-onset) and controls were used for the socio-demographic variables in Table 1. Person-year was coded as a series of year-specific dummy predictor variables. The models were estimated using a logistic link function.
